# Supplementary material
Source: ML conference proceedings conference paper supplement (https://openaccess.thecvf.com/content/CVPR2023/html/Lin_DynamicDet_A_Unified_CVPR_2023_paper.html)
Supplement: Supplementary file 1 [file Lin_DynamicDet_A_Unified_CVPR_2023_supplemental.pdf]

# DynamicDet: A Unified Dynamic Architecture for Object Detection

Zhihao Lin Yongtao Wang<sup>†</sup> Jinhe Zhang Xiaojie Chu  
Wangxuan Institute of Computer Technology, Peking University

linzhihao@stu.pku.edu.cn, wyt@pku.edu.cn  
jinhezhang17@gmail.com, chuxiaojie@stu.pku.edu.cn

## A. Pseudo code for dynamic detector

We present the pseudo code of training the adaptive router on Algorithm 1, and the dynamic inference on Algorithm 2.

```
Input: The dynamic detector constructed by the first backbone  $\mathcal{B}_1$ , the first neck and head  $\mathcal{D}_1$ , the second backbone  $\mathcal{B}_2$ , the second neck and head  $\mathcal{D}_2$ , the composite connection module  $\mathcal{G}$ , and the adaptive router  $\mathcal{R}$ . The median of the training loss difference between two detectors  $\Delta$ . Input images  $\mathbf{x}_i \in \mathbf{X}$  and the corresponding ground truths  $\bar{\mathbf{y}}_i \in \bar{\mathbf{Y}}$ . Training iteration  $T$ .  
for  $i = 1, \dots, T$  do  
     $F_1 = \mathcal{B}_1(\mathbf{x}_i)$ ; // Extract the first multi-scale features.  
     $\mathbf{y}_1 = \mathcal{D}_1(F_1)$ ; // Predict the detection results by the first detector.  
     $\phi = \mathcal{R}(F_1)$ ; // Predict the difficulty score.  
     $H = \mathcal{G}(F_1)$ ; // Embed the first multi-scale features.  
     $F_2 = \mathcal{B}_2(\mathbf{x}_i, H)$ ; // Extract the enhanced multi-scale features based on the input image and the embedding of previous multi-scale features.  
     $\mathbf{y}_2 = \mathcal{D}_2(F_2)$ ; // Predict the detection results by the second detector.  
     $\mathcal{L} = ((1 - \phi)(\mathcal{L}_{det}(\mathbf{y}_1, \bar{\mathbf{y}}_i) - \Delta/2) + \phi(\mathcal{L}_{det}(\mathbf{y}_2, \bar{\mathbf{y}}_i) + \Delta/2))$ ; // Loss.  
    update the parameters of adaptive router based on the gradient from loss  $\mathcal{L}$ .  
end
```

**Algorithm 1:** Pseudo code of training the adaptive router on DynamicDet.

```
Input: The dynamic detector constructed by the first backbone  $\mathcal{B}_1$ , the first neck and head  $\mathcal{D}_1$ , the second backbone  $\mathcal{B}_2$ , the second neck and head  $\mathcal{D}_2$ , the composite connection module  $\mathcal{G}$ , and the adaptive router  $\mathcal{R}$ . Input image  $\mathbf{x}$ . Threshold  $\tau$ .  
Output: Predicted detection results  $\mathbf{y}$   
 $F_1 = \mathcal{B}_1(\mathbf{x})$ ; // Extract the first multi-scale features.  
 $\phi = \mathcal{R}(F_1)$ ; // Predict the difficulty score.  
if  $\phi \leq \tau$  then  
    // Easy image.  
     $\mathbf{y} = \mathcal{D}_1(F_1)$ ; // Predict the detection results by the first detector.  
else  
    // Hard image.  
     $H = \mathcal{G}(F_1)$ ; // Embed the first multi-scale features.  
     $F_2 = \mathcal{B}_2(\mathbf{x}, H)$ ; // Extract the enhanced multi-scale features based on the input image and the embedding of previous multi-scale features.  
     $\mathbf{y} = \mathcal{D}_2(F_2)$ ; // Predict the detection results by the second detector.  
end
```

**Algorithm 2:** Pseudo code of dynamic inference on DynamicDet.

## B. Additional results

### B.1. More comparison on real-time object detection

We present more precision results (e.g., AP<sub>50</sub>) to compare with other real-time object detectors in Tab. 4.

<sup>†</sup>Corresponding author.

| Model                     | Size        | FLOPs         | FPS              | AP          | AP <sub>50</sub> | AP <sub>75</sub> | AP <sub>S</sub> | AP <sub>M</sub> | AP <sub>L</sub> |
|---------------------------|-------------|---------------|------------------|-------------|------------------|------------------|-----------------|-----------------|-----------------|
| EAutoDet-S [6]            | 640         | 24.9G         | 120 <sup>†</sup> | 40.1        | 58.7             | 43.5             | 21.7            | 43.8            | 50.5            |
| EAutoDet-M [6]            | 640         | 60.8G         | 70 <sup>†</sup>  | 45.2        | 63.5             | 49.1             | 25.7            | 49.1            | 57.3            |
| EAutoDet-L [6]            | 640         | 115.4G        | 59 <sup>†</sup>  | 47.9        | 66.3             | 52.0             | 28.3            | 52.0            | 59.9            |
| EAutoDet-X [6]            | 640         | 225.3G        | 41 <sup>†</sup>  | 49.2        | 67.5             | 53.6             | 30.4            | 53.4            | 61.5            |
| EfficientDet-D0 [4]       | 512         | 2.5G          | 98 <sup>†</sup>  | 34.6        | 53.0             | 37.1             | -               | -               | -               |
| EfficientDet-D1 [4]       | 640         | 6.1G          | 74 <sup>†</sup>  | 40.5        | 59.1             | 43.7             | -               | -               | -               |
| YOLOX-S [1]               | 640         | 26.8G         | 102 <sup>†</sup> | 40.5        | -                | -                | -               | -               | -               |
| YOLOX-M [1]               | 640         | 73.8G         | 81 <sup>†</sup>  | 47.2        | -                | -                | -               | -               | -               |
| YOLOX-L [1]               | 640         | 155.6G        | 69 <sup>†</sup>  | 50.1        | -                | -                | -               | -               | -               |
| YOLOX-X [1]               | 640         | 281.9G        | 58 <sup>†</sup>  | 51.5        | -                | -                | -               | -               | -               |
| YOLOv5-N (r6.2) [2]       | 640         | 4.5G          | 200              | 28.1        | 46.2             | 29.4             | 12.8            | 31.3            | 35.4            |
| YOLOv5-S (r6.2) [2]       | 640         | 16.5G         | 196              | 37.7        | 57.3             | 40.5             | 19.8            | 41.7            | 47.4            |
| YOLOv5-M (r6.2) [2]       | 640         | 49.0G         | 137              | 45.4        | 64.3             | 49.2             | 26.3            | 49.9            | 56.4            |
| YOLOv5-L (r6.2) [2]       | 640         | 109.1G        | 114              | 49.0        | 67.5             | 53.1             | 29.8            | 53.4            | 61.2            |
| YOLOv5-X (r6.2) [2]       | 640         | 205.7G        | 100              | 50.9        | 69.2             | 55.1             | 31.9            | 55.2            | 63.6            |
| YOLOv6-N [3]              | 640         | 11.1G         | 216              | 36.4        | 51.9             | 39.2             | 15.5            | 39.5            | 50.6            |
| YOLOv6-T [3]              | 640         | 36.7G         | 206              | 41.2        | 57.9             | 44.6             | 19.9            | 45.0            | 56.0            |
| YOLOv6-S [3]              | 640         | 44.2G         | 184              | 43.9        | 60.9             | 47.5             | 22.2            | 47.9            | 58.9            |
| YOLOv6-M [3]              | 640         | 82.2G         | 109              | 49.8        | 67.0             | 54.3             | 28.5            | 54.6            | 65.4            |
| YOLOv6-L [3]              | 640         | 144.0G        | 76               | 52.3        | 69.9             | 56.8             | 31.6            | 57.2            | 67.8            |
| PP-YOLOE+-S [7]           | 640         | 17.4G         | 208 <sup>†</sup> | 43.9        | -                | -                | -               | -               | -               |
| PP-YOLOE+-M [7]           | 640         | 49.9G         | 123 <sup>†</sup> | 50.0        | -                | -                | -               | -               | -               |
| PP-YOLOE+-L [7]           | 640         | 110.1G        | 78 <sup>†</sup>  | 53.3        | -                | -                | -               | -               | -               |
| PP-YOLOE+-X [7]           | 640         | 206.6G        | 45 <sup>†</sup>  | 54.9        | -                | -                | -               | -               | -               |
| YOLOv7 [5]                | 640         | 104.7G        | 114              | 51.4        | 69.7             | 55.9             | 31.8            | 55.5            | 65.0            |
| <b>Dy-YOLOv7 / 10</b>     | <b>640</b>  | <b>112.4G</b> | <b>110</b>       | <b>52.1</b> | <b>70.5</b>      | <b>56.8</b>      | <b>33.3</b>     | <b>55.9</b>     | <b>64.7</b>     |
| <b>Dy-YOLOv7 / 50</b>     | <b>640</b>  | <b>143.2G</b> | <b>96</b>        | <b>53.3</b> | <b>71.7</b>      | <b>58.1</b>      | <b>34.9</b>     | <b>57.0</b>     | <b>65.4</b>     |
| <b>Dy-YOLOv7 / 90</b>     | <b>640</b>  | <b>174.0G</b> | <b>85</b>        | <b>53.8</b> | <b>72.2</b>      | <b>58.7</b>      | <b>35.3</b>     | <b>57.5</b>     | <b>66.3</b>     |
| <b>Dy-YOLOv7 / 100</b>    | <b>640</b>  | <b>181.7G</b> | <b>83</b>        | <b>53.9</b> | <b>72.2</b>      | <b>58.7</b>      | <b>35.3</b>     | <b>57.6</b>     | <b>66.4</b>     |
| YOLOv7-X [5]              | 640         | 189.9G        | 105              | 53.1        | 71.2             | 57.8             | 33.8            | 57.1            | 67.4            |
| <b>Dy-YOLOv7-X / 10</b>   | <b>640</b>  | <b>201.7G</b> | <b>98</b>        | <b>53.3</b> | <b>71.6</b>      | <b>58.0</b>      | <b>34.2</b>     | <b>57.1</b>     | <b>67.1</b>     |
| <b>Dy-YOLOv7-X / 50</b>   | <b>640</b>  | <b>248.9G</b> | <b>78</b>        | <b>54.4</b> | <b>72.7</b>      | <b>59.3</b>      | <b>36.0</b>     | <b>58.0</b>     | <b>67.7</b>     |
| <b>Dy-YOLOv7-X / 90</b>   | <b>640</b>  | <b>296.1G</b> | <b>65</b>        | <b>55.0</b> | <b>73.2</b>      | <b>59.9</b>      | <b>36.6</b>     | <b>58.6</b>     | <b>68.2</b>     |
| <b>Dy-YOLOv7-X / 100</b>  | <b>640</b>  | <b>307.9G</b> | <b>64</b>        | <b>55.0</b> | <b>73.2</b>      | <b>60.0</b>      | <b>36.6</b>     | <b>58.7</b>     | <b>68.5</b>     |
| EfficientDet-D2 [4]       | 768         | 11.0G         | 56 <sup>†</sup>  | 43.9        | 62.7             | 47.6             | -               | -               | -               |
| EfficientDet-D3 [4]       | 896         | 25.0G         | 34 <sup>†</sup>  | 47.2        | 65.9             | 51.2             | -               | -               | -               |
| EfficientDet-D4 [4]       | 1024        | 55.0G         | 23 <sup>†</sup>  | 49.7        | 68.4             | 53.9             | -               | -               | -               |
| EfficientDet-D5 [4]       | 1280        | 135.0G        | 14 <sup>†</sup>  | 51.5        | 70.5             | 56.1             | -               | -               | -               |
| EfficientDet-D6 [4]       | 1280        | 226.0G        | 11 <sup>†</sup>  | 52.6        | 71.5             | 57.2             | -               | -               | -               |
| EfficientDet-D7 [4]       | 1536        | 325.0G        | 8 <sup>†</sup>   | 53.7        | 72.4             | 58.4             | -               | -               | -               |
| EfficientDet-D7X [4]      | 1536        | 410.0G        | 7 <sup>†</sup>   | 55.1        | 74.3             | 59.9             | -               | -               | -               |
| YOLOv5-N6 (r6.2) [2]      | 1280        | 18.4G         | 161              | 36.2        | 55.0             | 39.0             | 19.4            | 39.3            | 45.2            |
| YOLOv5-S6 (r6.2) [2]      | 1280        | 67.2G         | 152              | 44.6        | 63.9             | 48.6             | 26.4            | 48.3            | 55.1            |
| YOLOv5-M6 (r6.2) [2]      | 1280        | 200.0G        | 96               | 51.4        | 69.7             | 56.0             | 33.3            | 55.2            | 62.5            |
| YOLOv5-L6 (r6.2) [2]      | 1280        | 445.6G        | 65               | 53.8        | 71.8             | 58.5             | 36.3            | 57.6            | 65.0            |
| YOLOv5-X6 (r6.2) [2]      | 1280        | 839.2G        | 39               | 55.0        | 72.8             | 59.8             | 37.3            | 58.5            | 66.8            |
| YOLOv7-W6 [5]             | 1280        | 360.0G        | 78               | 54.9        | 72.6             | 60.1             | 37.3            | 58.7            | 67.1            |
| YOLOv7-E6 [5]             | 1280        | 515.2G        | 52               | 56.0        | 73.5             | 61.2             | 38.0            | 59.9            | 68.4            |
| YOLOv7-D6 [5]             | 1280        | 806.8G        | 41               | 56.6        | 74.0             | 61.8             | 38.8            | 60.1            | 69.5            |
| YOLOv7-E6E [5]            | 1280        | 843.2G        | 33               | 56.8        | 74.4             | 62.1             | 39.3            | 60.5            | 69.0            |
| <b>Dy-YOLOv7-W6 / 10</b>  | <b>1280</b> | <b>384.2G</b> | <b>74</b>        | <b>55.2</b> | <b>73.0</b>      | <b>60.4</b>      | <b>37.9</b>     | <b>58.4</b>     | <b>66.6</b>     |
| <b>Dy-YOLOv7-W6 / 50</b>  | <b>1280</b> | <b>480.8G</b> | <b>58</b>        | <b>56.1</b> | <b>73.8</b>      | <b>61.4</b>      | <b>39.3</b>     | <b>59.3</b>     | <b>66.9</b>     |
| <b>Dy-YOLOv7-W6 / 90</b>  | <b>1280</b> | <b>577.4G</b> | <b>48</b>        | <b>56.7</b> | <b>74.3</b>      | <b>62.1</b>      | <b>39.5</b>     | <b>59.9</b>     | <b>67.8</b>     |
| <b>Dy-YOLOv7-W6 / 100</b> | <b>1280</b> | <b>601.6G</b> | <b>46</b>        | <b>56.8</b> | <b>74.4</b>      | <b>62.1</b>      | <b>39.6</b>     | <b>59.9</b>     | <b>68.3</b>     |

<sup>†</sup> The FPS marked with † are from the corresponding papers, and others are measured on the same machine with 1 NVIDIA V100 GPU.

Table 4. Comparison of the state-of-the-art real-time object detectors on COCO *test-dev*.

| Model              | Size | FLOPs  | FPS | AP   | AP <sub>50</sub> | AP <sub>75</sub> | AP <sub>s</sub> | AP <sub>M</sub> | AP <sub>L</sub> |
|--------------------|------|--------|-----|------|------------------|------------------|-----------------|-----------------|-----------------|
| Dy-YOLOv7 / 0      | 640  | 104.7G | 114 | 51.1 | 69.5             | 55.6             | 31.5            | 55.2            | 64.5            |
| Dy-YOLOv7 / 10     | 640  | 112.4G | 110 | 52.1 | 70.5             | 56.8             | 33.3            | 55.9            | 64.7            |
| Dy-YOLOv7 / 20     | 640  | 120.1G | 106 | 52.5 | 71.0             | 57.3             | 34.1            | 56.2            | 64.9            |
| Dy-YOLOv7 / 30     | 640  | 127.8G | 102 | 52.9 | 71.3             | 57.6             | 34.5            | 56.5            | 65.0            |
| Dy-YOLOv7 / 40     | 640  | 135.5G | 99  | 53.1 | 71.6             | 57.9             | 34.7            | 56.8            | 65.2            |
| Dy-YOLOv7 / 50     | 640  | 143.2G | 96  | 53.3 | 71.7             | 58.1             | 34.9            | 57.0            | 65.4            |
| Dy-YOLOv7 / 60     | 640  | 150.9G | 93  | 53.5 | 71.9             | 58.3             | 35.1            | 57.2            | 65.5            |
| Dy-YOLOv7 / 70     | 640  | 158.6G | 91  | 53.6 | 72.0             | 58.5             | 35.2            | 57.4            | 65.7            |
| Dy-YOLOv7 / 80     | 640  | 166.3G | 88  | 53.7 | 72.1             | 58.6             | 35.3            | 57.5            | 66.0            |
| Dy-YOLOv7 / 90     | 640  | 174.0G | 85  | 53.8 | 72.2             | 58.7             | 35.3            | 57.5            | 66.3            |
| Dy-YOLOv7 / 100    | 640  | 181.7G | 83  | 53.9 | 72.2             | 58.7             | 35.3            | 57.6            | 66.4            |
| Dy-YOLOv7-X / 0    | 640  | 189.9G | 105 | 52.6 | 70.7             | 57.2             | 32.9            | 56.6            | 67.1            |
| Dy-YOLOv7-X / 10   | 640  | 201.7G | 98  | 53.3 | 71.6             | 58.0             | 34.2            | 57.1            | 67.1            |
| Dy-YOLOv7-X / 20   | 640  | 213.5G | 93  | 53.7 | 71.9             | 58.5             | 34.8            | 57.3            | 67.4            |
| Dy-YOLOv7-X / 30   | 640  | 225.3G | 86  | 53.9 | 72.2             | 58.8             | 35.3            | 57.5            | 67.4            |
| Dy-YOLOv7-X / 40   | 640  | 237.1G | 82  | 54.1 | 72.5             | 59.0             | 35.6            | 57.8            | 67.4            |
| Dy-YOLOv7-X / 50   | 640  | 248.9G | 78  | 54.4 | 72.7             | 59.3             | 36.0            | 58.0            | 67.7            |
| Dy-YOLOv7-X / 60   | 640  | 260.7G | 75  | 54.6 | 72.8             | 59.5             | 36.3            | 58.2            | 67.8            |
| Dy-YOLOv7-X / 70   | 640  | 272.5G | 70  | 54.7 | 72.9             | 59.6             | 36.4            | 58.3            | 67.8            |
| Dy-YOLOv7-X / 80   | 640  | 284.3G | 68  | 54.8 | 73.0             | 59.8             | 36.6            | 58.4            | 68.0            |
| Dy-YOLOv7-X / 90   | 640  | 296.1G | 65  | 55.0 | 73.2             | 59.9             | 36.6            | 58.6            | 68.2            |
| Dy-YOLOv7-X / 100  | 640  | 307.9G | 64  | 55.0 | 73.2             | 60.0             | 36.6            | 58.7            | 68.5            |
| Dy-YOLOv7-W6 / 0   | 1280 | 360.0G | 78  | 54.7 | 72.4             | 59.8             | 36.6            | 58.1            | 66.5            |
| Dy-YOLOv7-W6 / 10  | 1280 | 384.2G | 74  | 55.2 | 73.0             | 60.4             | 37.9            | 58.4            | 66.6            |
| Dy-YOLOv7-W6 / 20  | 1280 | 408.3G | 69  | 55.5 | 73.3             | 60.8             | 38.5            | 58.7            | 66.7            |
| Dy-YOLOv7-W6 / 30  | 1280 | 432.5G | 66  | 55.8 | 73.5             | 61.1             | 38.8            | 58.9            | 66.7            |
| Dy-YOLOv7-W6 / 40  | 1280 | 456.6G | 62  | 55.9 | 73.7             | 61.2             | 39.1            | 59.1            | 66.8            |
| Dy-YOLOv7-W6 / 50  | 1280 | 480.8G | 58  | 56.1 | 73.8             | 61.4             | 39.3            | 59.3            | 66.9            |
| Dy-YOLOv7-W6 / 60  | 1280 | 505.0G | 56  | 56.2 | 73.9             | 61.6             | 39.4            | 59.4            | 67.0            |
| Dy-YOLOv7-W6 / 70  | 1280 | 529.1G | 53  | 56.3 | 74.0             | 61.7             | 39.4            | 59.5            | 67.1            |
| Dy-YOLOv7-W6 / 80  | 1280 | 553.3G | 51  | 56.5 | 74.2             | 61.9             | 39.4            | 59.7            | 67.5            |
| Dy-YOLOv7-W6 / 90  | 1280 | 577.4G | 48  | 56.7 | 74.3             | 62.1             | 39.5            | 59.9            | 67.8            |
| Dy-YOLOv7-W6 / 100 | 1280 | 601.6G | 46  | 56.8 | 74.4             | 62.1             | 39.6            | 59.9            | 68.3            |

Table 5. Detailed results of dynamic YOLOv7 models on COCO *test-dev*.

## B.2. More results for dynamic detectors

We present more results for our dynamic detector (*i.e.*, Dy-YOLOv7 with / 0, / 10, ..., / 100) in Tab. 5. It is observed that our dynamic detectors can obtain a wide range of trade-offs of different precision and speed by proposed variable-speed inference strategy. For instance, using the same weight with different thresholds for inference, our Dy-YOLOv7-W6 can achieve 54.7%~56.8% mAP with 78~46 FPS.

## C. Additional analyses

### C.1. Consistency of the inference time

To further demonstrate the consistency of the inference time between the validation set and the test set, we compare the inference time of Dy-YOLOv7-W6 on these two sets. Specifically, we calculate the thresholds on the validation set of different sizes (*i.e.*, 0.5k, 2k, 5k) and measure their inference time on the validation set and the test set. As shown in Fig. 11, it is observed that the inference time is consistent between these two sets when calculating the thresholds by 5k validation images, and is very close to the ideal case. Moreover, when the validation set’s size decreases, the inference time consistency becomes slightly worse but is still acceptable.

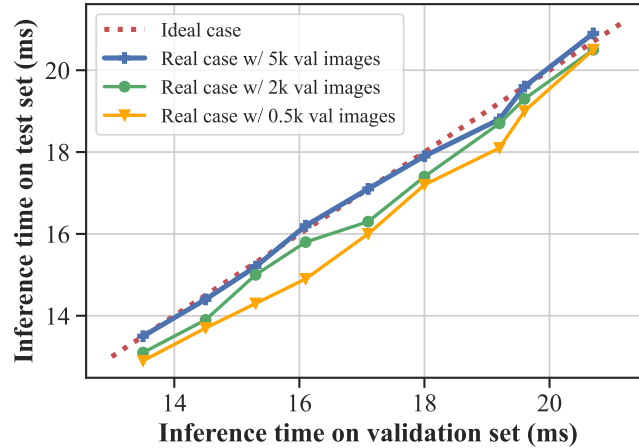

Figure 11. Comparison of the inference time on the validation set and the test set under the different thresholds obtained from the validation set with different size.

## References

- [1] Zheng Ge, Songtao Liu, Feng Wang, Zeming Li, and Jian Sun. Yolox: Exceeding yolo series in 2021. *arXiv preprint arXiv:2107.08430*, 2021. 2
- [2] Jocher Glenn. Yolov5 release v6.2, 2022. <https://github.com/ultralytics/yolov5/releases/tag/v6.2>. 2
- [3] Chuyi Li, Lulu Li, Hongliang Jiang, Kaiheng Weng, Yifei Geng, Liang Li, Zaidan Ke, Qingyuan Li, Meng Cheng, Weiqiang Nie, et al. Yolov6: a single-stage object detection framework for industrial applications. *arXiv preprint arXiv:2209.02976*, 2022. 2
- [4] Mingxing Tan, Ruoming Pang, and Quoc V Le. Efficientdet: Scalable and efficient object detection. In *CVPR*, pages 10781–10790, 2020. 2
- [5] Chien-Yao Wang, Alexey Bochkovskiy, and Hong-Yuan Mark Liao. Yolov7: Trainable bag-of-freebies sets new state-of-the-art for real-time object detectors. *arXiv preprint arXiv:2207.02696*, 2022. 2
- [6] Xiaoxing Wang, Jiale Lin, Juanping Zhao, Xiaokang Yang, and Junchi Yan. Eautodet: efficient architecture search for object detection. In *ECCV*, pages 668–684. Springer, 2022. 2
- [7] Shangliang Xu, Xinxin Wang, Wenyu Lv, Qinyao Chang, Cheng Cui, Kaipeng Deng, Guanzhong Wang, Qingqing Dang, Shengyu Wei, Yuning Du, et al. Pp-yoloe: An evolved version of yolo. *arXiv preprint arXiv:2203.16250*, 2022. 2
